# Supplementary material for: Use of feedback system control in optimizing chemical combinations to synthesize nanoparticles with desired characteristics
Source: Royal Society of Chemistry journal article supplement (doi:10.1039/c5ra24218e), 2016-01-01
Supplement: c5ra24218e1.pdf [file c5ra24218e1.pdf]

### Electronic Supplementary Material

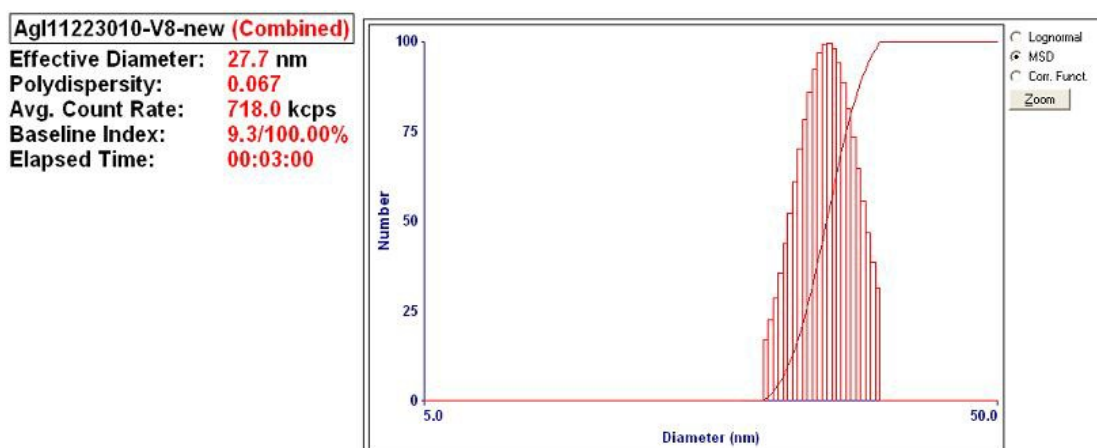

**Figure S1** Result of DLS measurement.

DLS is a convenient measurement to assess the particle size and distribution. From the result above, we can easily get the measuring result, which is  $27.7 \pm 7.2$  nm.

|   | Sodium citrate | AOT    | SDS  | cTAB | Tween20 | AgNO <sub>3</sub> | KI   | Mean diameter (nm) |
|---|----------------|--------|------|------|---------|-------------------|------|--------------------|
| 1 | 0              | 0.0025 | 0.02 | 0    | 0.06    | 0.1               | 0.1  | 10.2 ± 2.2         |
| 2 | 0              | 0.04   | 0.01 | 0    | 0.04    | 0.01              | 0.01 | 25.6 ± 5.3         |
| 3 | 0              | 0.04   | 0.01 | 0    | 0.04    | 0.1               | 0.1  | 37.9 ± 7.8         |
| 4 | 0              | 0.04   | 0.01 | 0    | 0.04    | 0.1               | 0.1  | 49.5 ± 11.2        |
| 5 | 0              | 0.01   | 0.04 | 0    | 0.01    | 0.01              | 0.01 | 66.2 ± 13.2        |
| 6 | 0              | 0.04   | 0.01 | 0    | 0.04    | 0.01              | 0.1  | 80.2 ± 20.6        |
| 7 | 0.04           | 0.0025 | 0    | 0    | 0.0025  | 0.025             | 0.1  | 105.1 ± 32.3       |
| 8 | 0              | 0      | 0.01 | 0    | 0       | 0.1               | 0.1  | 119.5 ± 38.5       |

**Table S1** Combinations of chemicals (unit: M).

We can get a wide range of particle sizes through different combination of chemicals.
